# Supplementary material for: Exchange of cysteamine, thiol ligand in binuclear cationic tetranitrosyl iron complex, for glutathione
Source: Royal Society of Chemistry journal article supplement (doi:10.1039/c4ra01766h), 2014-01-01
Supplement: c4ra01766h1.pdf [file c4ra01766h1.pdf]

**Supplementary information.**

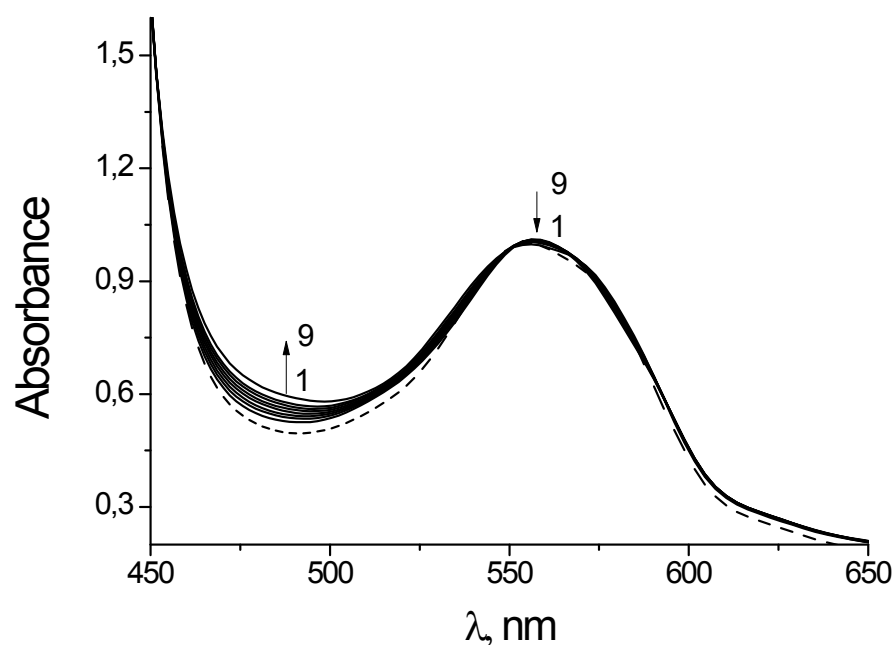

Figure a) Kinetics of change of difference spectra at the interaction of (**1**) ( $1.5 \cdot 10^{-4}$  M) with Hb ( $2 \cdot 10^{-5}$  M). Dotted line (1) is spectrum of Hb. Spectra 2-5 were registered at 0.08 (2), 0.33 (3), 0.6 (4) h after start of reaction; spectra 5-13 were registered with intervals 1 h, spectrum 15 at 1 h after start of reaction. Conditions of reaction: 25 °C, solvent is 0.05 M Tris-HCl buffer, pH 7.

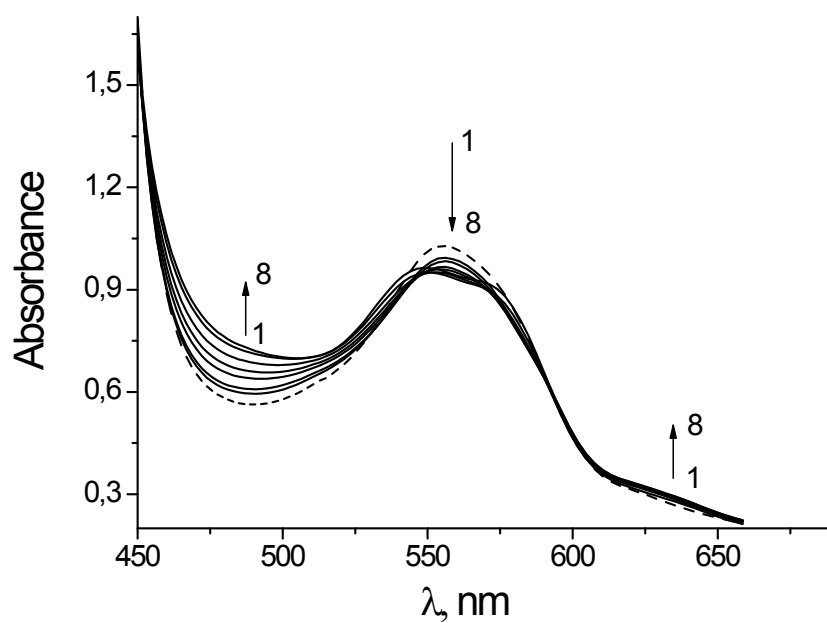

Figure b) Kinetics of change of difference spectra at the interaction of **(III)** ( $1.5 \cdot 10^{-4}$  M) with Hb ( $2 \cdot 10^{-5}$  M). Dotted line (1) is spectrum of Hb. Spectra 2-8 were registered at 0.5 (2), 1 (3), 3 (4), 5 (5), 7 (6), 9 (7), 11(8) h after start of reaction. Conditions of reaction: 25 °C, solvent is 0.05 M Tris-HCl buffer, pH 7.0

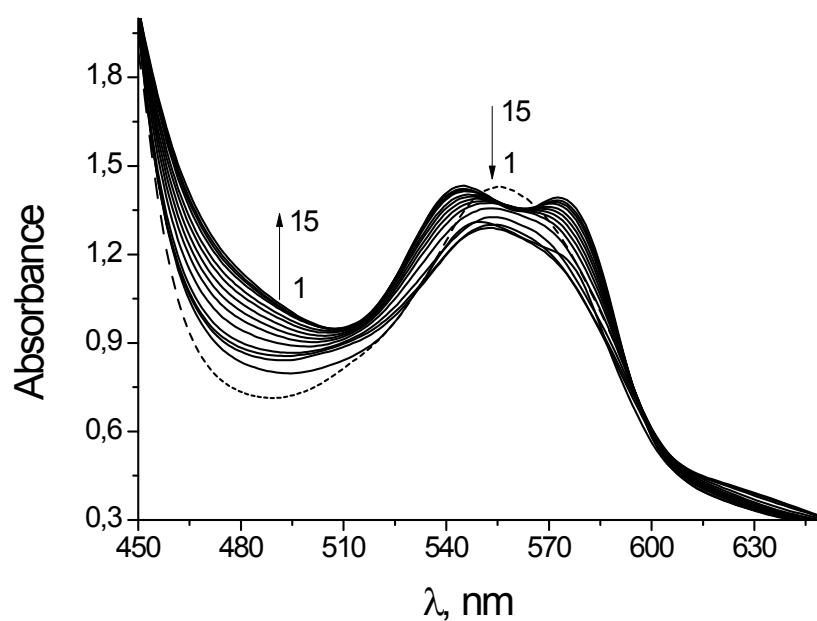

**Figure c)** Kinetics of change of difference spectra at the interaction of (*I*) ( $1.5 \cdot 10^{-4}$  M) with Hb ( $2 \cdot 10^{-5}$  M). Dotted line (1) is spectrum of Hb. Spectra 2-5 were registered at 0.08 (2), 0.33 (3), 0.6 (4) h after start of reaction; spectra 5-13 were registered with intervals 1 h, spectrum 15 at 11 h after start of reaction. Conditions of reaction: 25 °C, solvent is 0.05 M Tris-HCl buffer, pH 7.0.
